# Supplementary material for: Evidence for ~12-h ultradian gene programs in humans
Source: PubMed Central journal article supplement (PMC11325440; doi:10.1038/s44323-024-00005-1), 2024-08-09
Supplement: 44323_2024_5_MOESM1_ESM.pdf [file 44323_2024_5_MOESM1_ESM.pdf]

1 Supplementary Materials for

2

3 **Evidence for ~12-hour ultradian gene programs in humans**

4 Bokai Zhu<sup>1,2,3 \*</sup>, Silvia Liu<sup>2,4</sup>, Natalie L. David<sup>1,5,6</sup>, William Dion<sup>1</sup>, Nandini K Doshi<sup>1,6</sup>, Lauren B.

5 Siegel<sup>5</sup>, Tânia Amorim<sup>1,5,6</sup>, Rosemary E. Andrews<sup>1,6</sup>, GV Naveen Kumar<sup>1</sup>, Hanwen Li<sup>7</sup>, Saad Irfan<sup>1</sup>,

6 Tristan Pesaresi<sup>1,6</sup>, Ankit X. Sharma<sup>1</sup>, Michelle Sun<sup>1</sup>, Pouneh K. Fazeli<sup>5,6</sup> and Matthew L.

7 Steinhauser<sup>1,6,8 \*</sup>

8 Corresponding author: [bzhu@pitt.edu](mailto:bzhu@pitt.edu), [msteinhauser@pitt.edu](mailto:msteinhauser@pitt.edu)

9

10

11

12

13

14

15

16

17

18

19

20

21

22

23

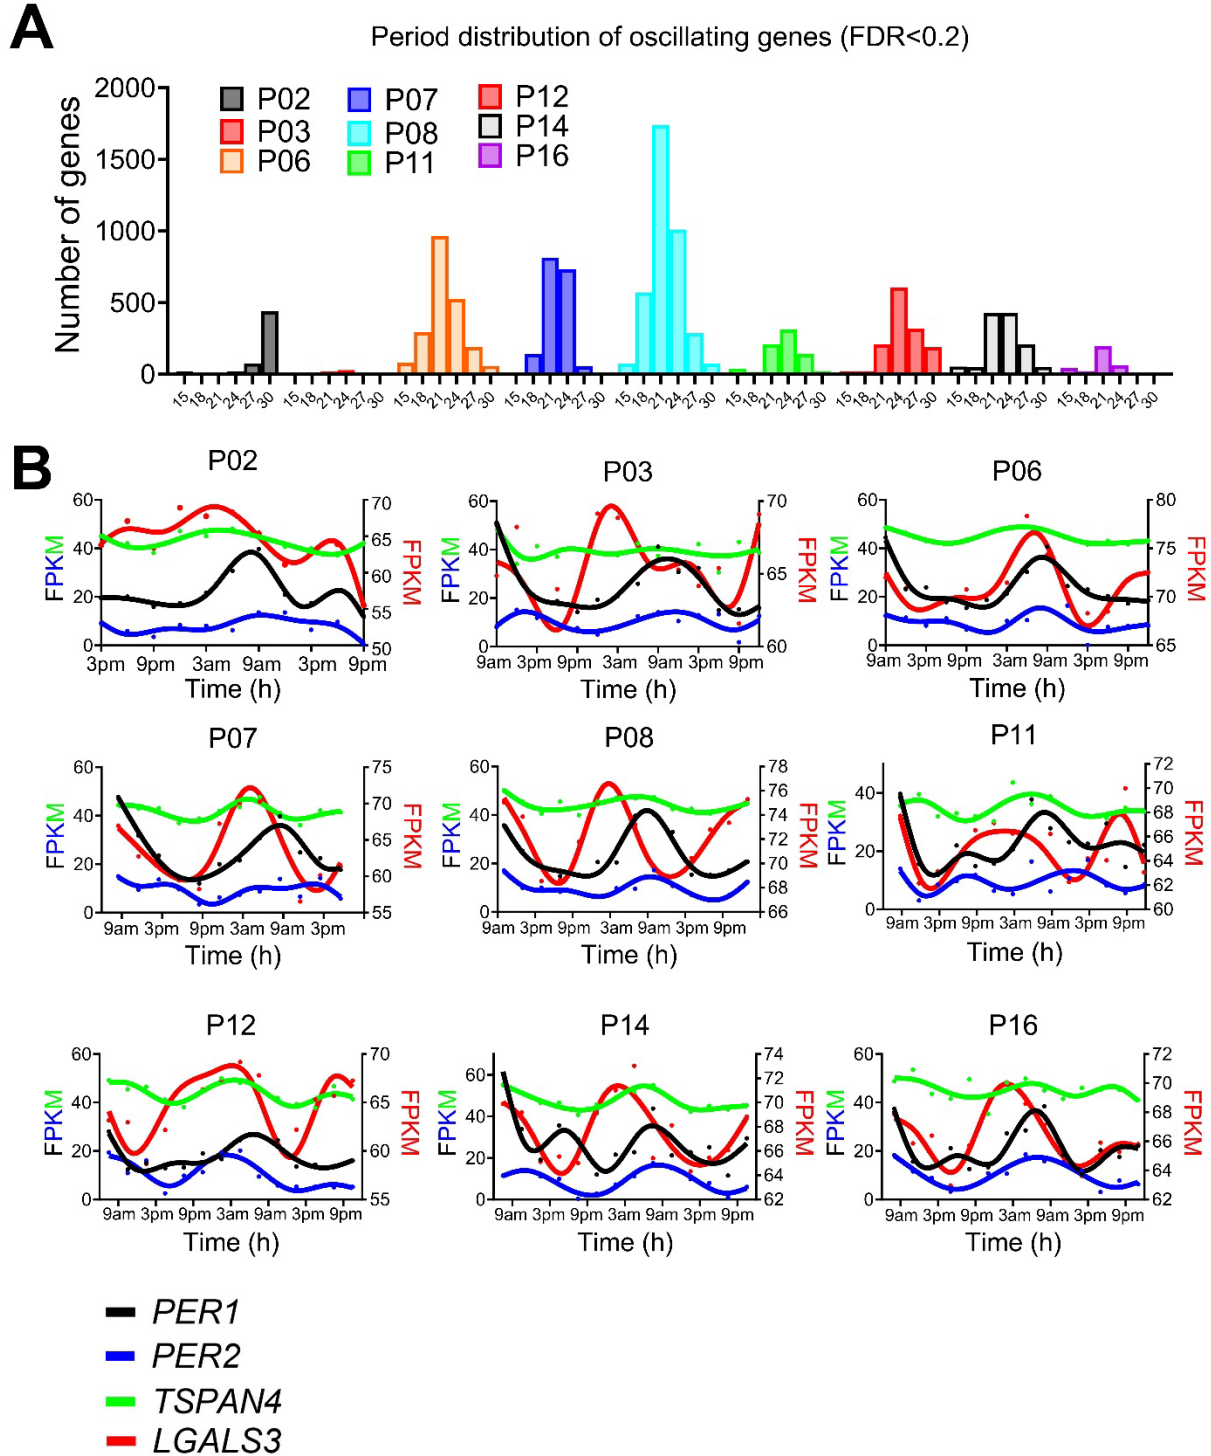

24

25 **Fig. S1. Inter-individual variability of ~24-hour rhythms of gene expression reported in the**  
 26 **Wittenbrink et al JCI study.** (A) Distribution of periods for gene oscillations between 15 and 30  
 27 hours and (B) Raw temporal expression profile (dot) and spline fit (solid line) of *PER1* (black),  
 28 *PER2* (blue), *TSPAN4* (green) and *LGALS3* (red) genes in nine different individuals, reported in  
 29 <sup>15</sup>.

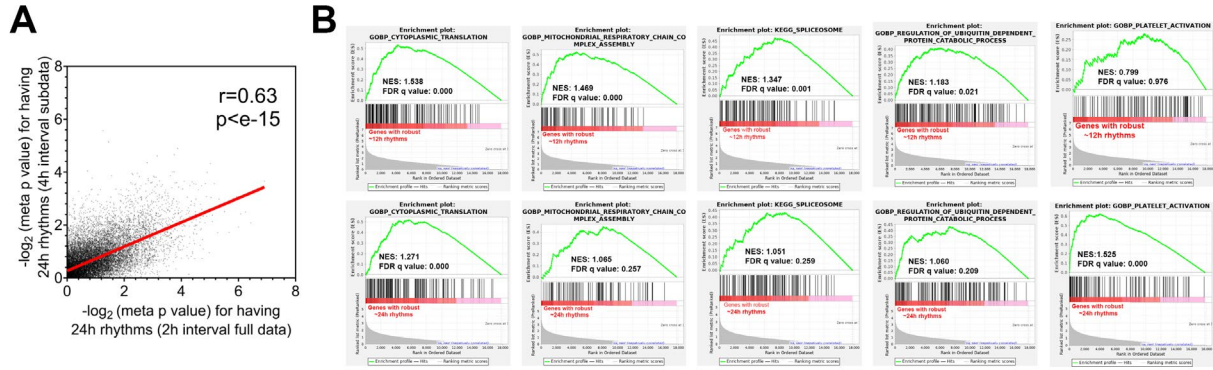

30

31 **Fig. S2. Genes with ~12h and ~24-hour rhythms are enriched in distinct biological**  
 32 **pathways. (A)** Scatter plot comparing log normalized meta p values for having ~24-hour rhythms  
 33 for each gene when the full 2h sampling interval dataset (x-axis) or the 4h sampling interval subset  
 34 (y-axis) was used for the analysis. **(B)** GSEA showing enrichment scores for different gene sets  
 35 in ~12-hour (top) and ~24-hour (bottom) genes.

36

37

38

39

40

41

42

43

44

45

46

47

48

49

50

51

52

53

54

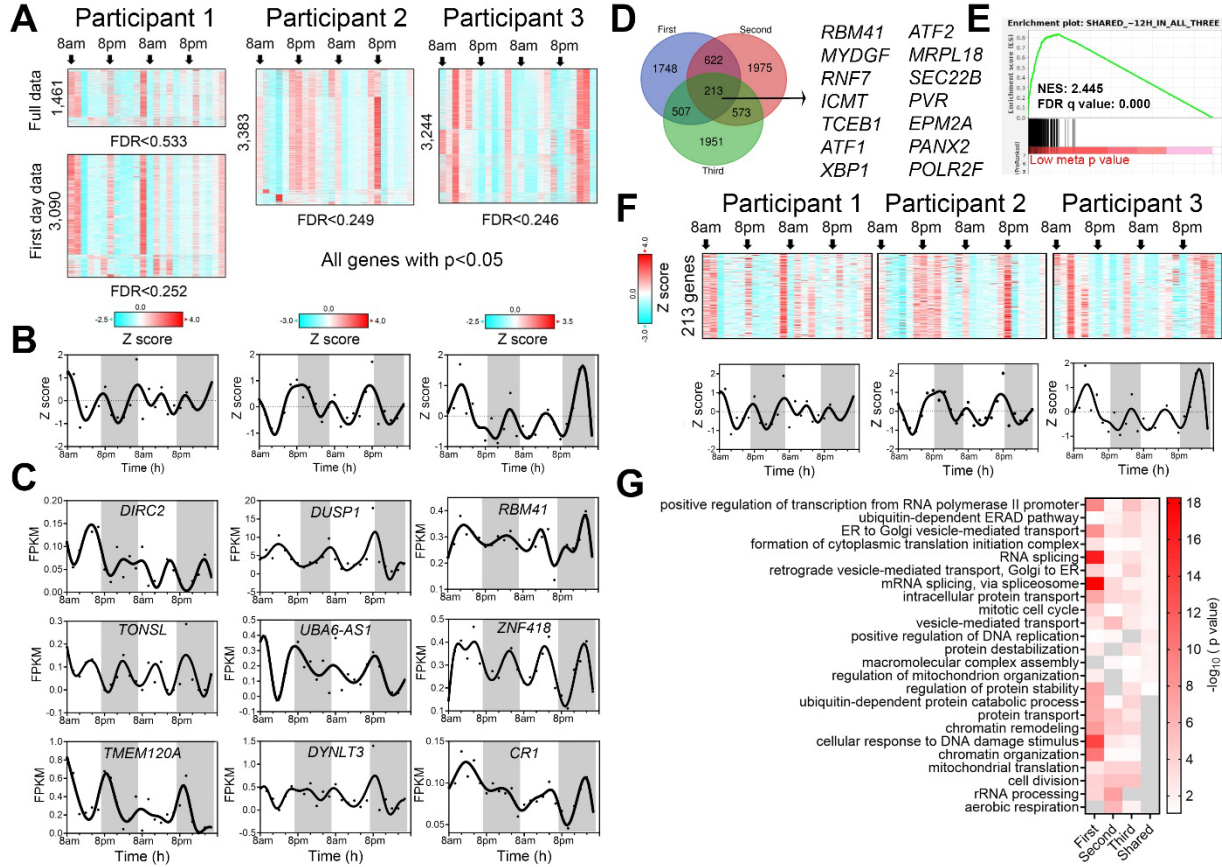

55

56 **Fig. S3. RAIN analyses of 48-hour temporal transcriptome to detect ~12-hour genes.** A  
 57 single data point was inputted for each sample collected over the 48h protocol. (A) Heatmap of  
 58 ~12-hour genes from all three participants with respective p values smaller than 0.05. The  
 59 identification of a greater number of ~12-hour genes with lower FDR in the first participant with  
 60 restriction of inputted data to the first 24 hours indicates the ~12-hour rhythm is dampened in the  
 61 second day in this participant, consistent with what was found with the eigenvalue/pencil method.  
 62 (B) Quantification of the average expression (Z score normalized) of genes shown in A, with raw  
 63 data (dots) and spline fit (solid lines) shown. (C) Raw temporal expression (dot) profile and spline  
 64 fit (solid line) of top three ~12-hour genes with the smallest p values in each of the three individuals.  
 65 (D) Venn diagram depicting common and distinct ~12-hour genes for each individual, with  
 66 selective common genes shown on the right. (E) GSEA showing enrichment score of 213 common  
 67 ~12-hour genes on robust ~12-hour genes ranked by meta p values. (F) Heatmap and  
 68 quantification of 213 common ~12-hour genes uncovered from all three participants. (G) GO  
 69 analysis of all and shared ~12-hour genes in each individual.

70

71

72

73

74

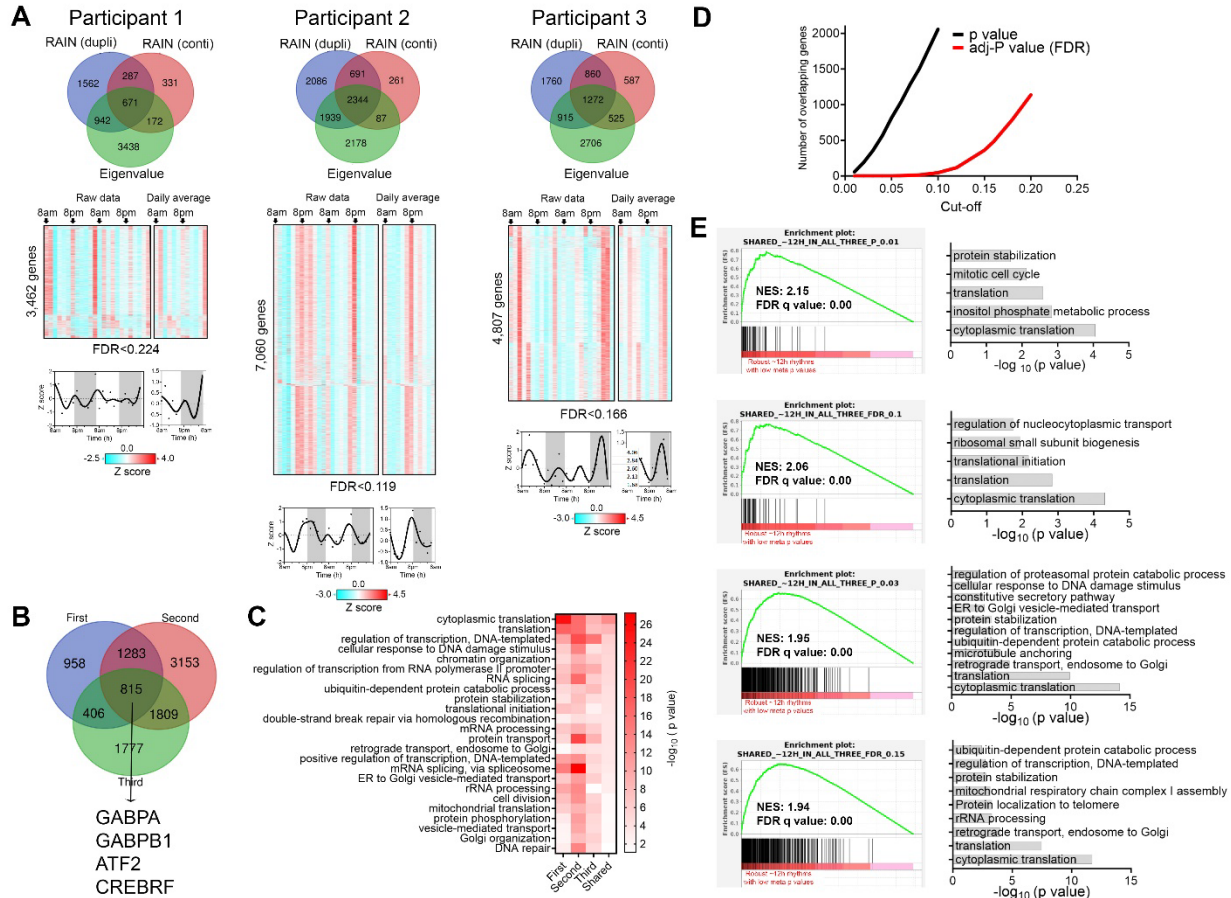

75

76 **Fig. S4. RAIN analyses of temporal transcriptomes using consecutive 24 hours datasets**  
 77 **as biological replicates. (A)** Venn diagram comparing the ~12-hour programs uncovered by the  
 78 three methods (top) and heatmap and quantification of ~12-hour genes uncovered by the RAIN  
 79 dupli method in all three participants (bottom). **(B)** Venn diagram depicting common and distinct  
 80 ~12-hour genes uncovered in each participant. **(C)** GO analysis of all and shared ~12-hour genes  
 81 in all three participants. **(D)** Scatter plot comparing the number of overlapping ~12-hour genes  
 82 between the three individuals against different p values or FDR cut-offs for all individuals. **(E)**  
 83 GSEA showing enrichment scores for four gene sets of overlapping ~12-hour genes with  $p < 0.01$   
 84 (56 genes),  $p < 0.03$  (358 genes),  $FDR < 0.1$  (46 genes) and  $FDR < 0.15$  (361 genes) cut-off (left) on  
 85 ~12-hour genes ranked by meta-p values and GO analysis of these genes (right).

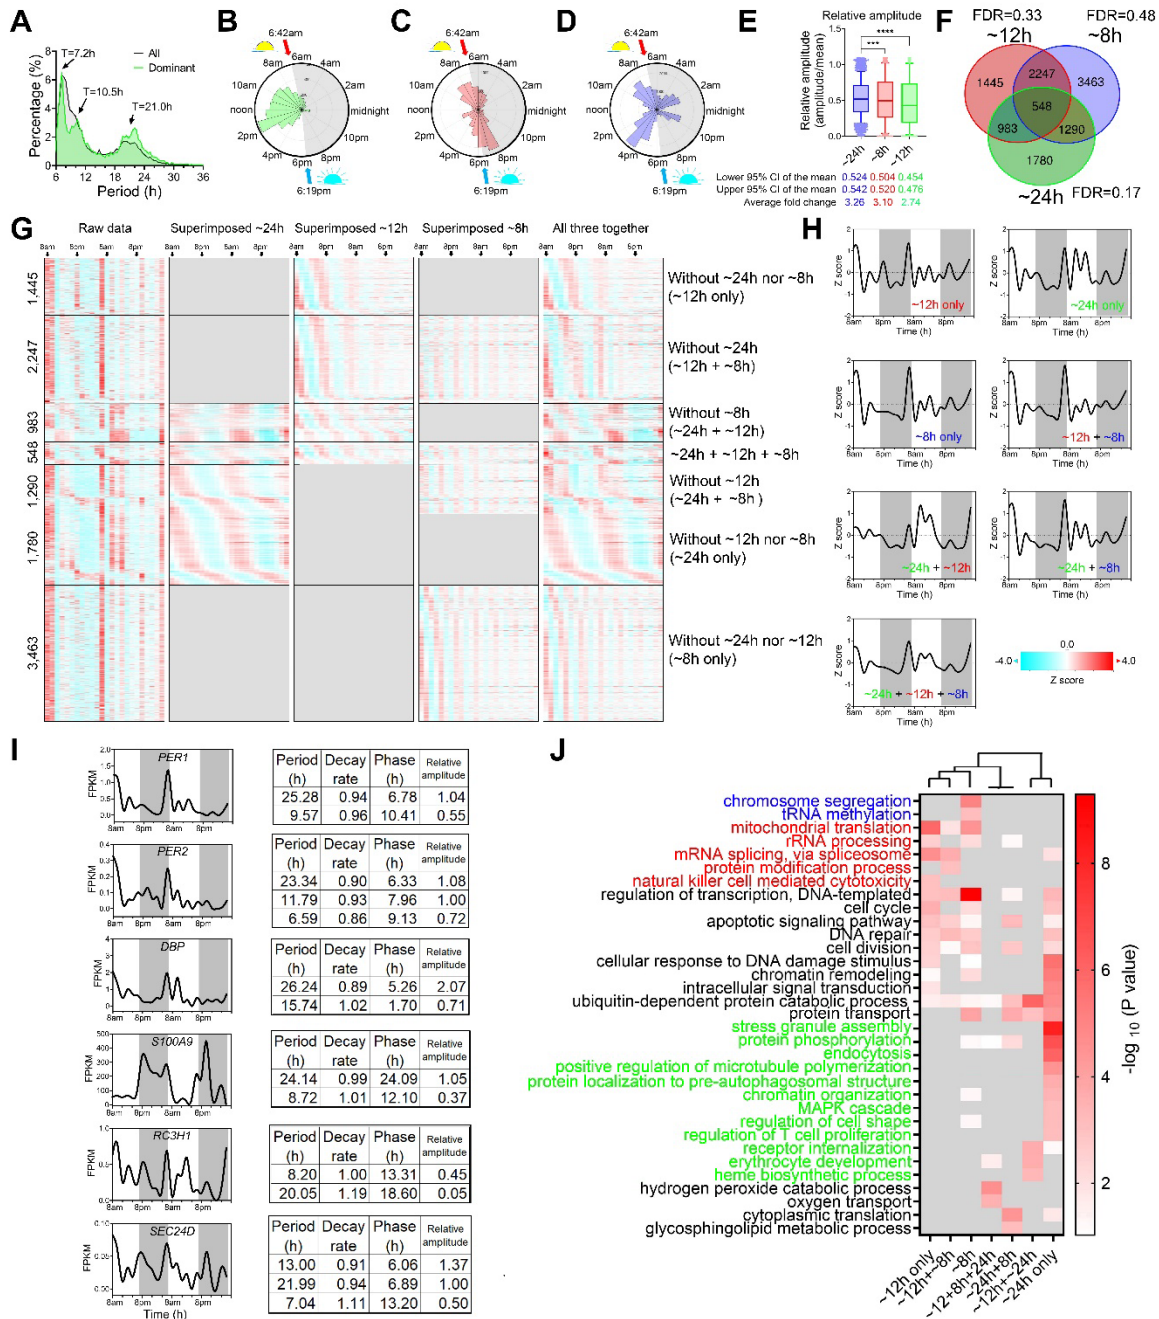

86

87 **Fig. S5. Transcriptome spectrum of first human participant.** (A) Period distribution of all and  
 88 dominant oscillations. (B-D) Polar histogram illustrating the phase distribution of ~24-hour (B),  
 89 ~12-hour (C) and ~8-hour (D) oscillations. (E) Relative amplitude (mean-normalized) of ~8-hour,  
 90 ~12-hour and ~24-hour oscillations. (F) Venn diagram showing distinct and shared oscillations for  
 91 each period. (G, H) Heatmap (G) and quantification (H) of decomposition of raw temporal  
 92 transcriptome into harmonics cycling at ~8-hour, ~12-hour or ~24-hour periods. (I) Representative  
 93 temporal expression of select genes and eigenvalue/pencil decomposition uncovering all  
 94 superimposed oscillations for each gene. (J) GO analysis of all genes in G.

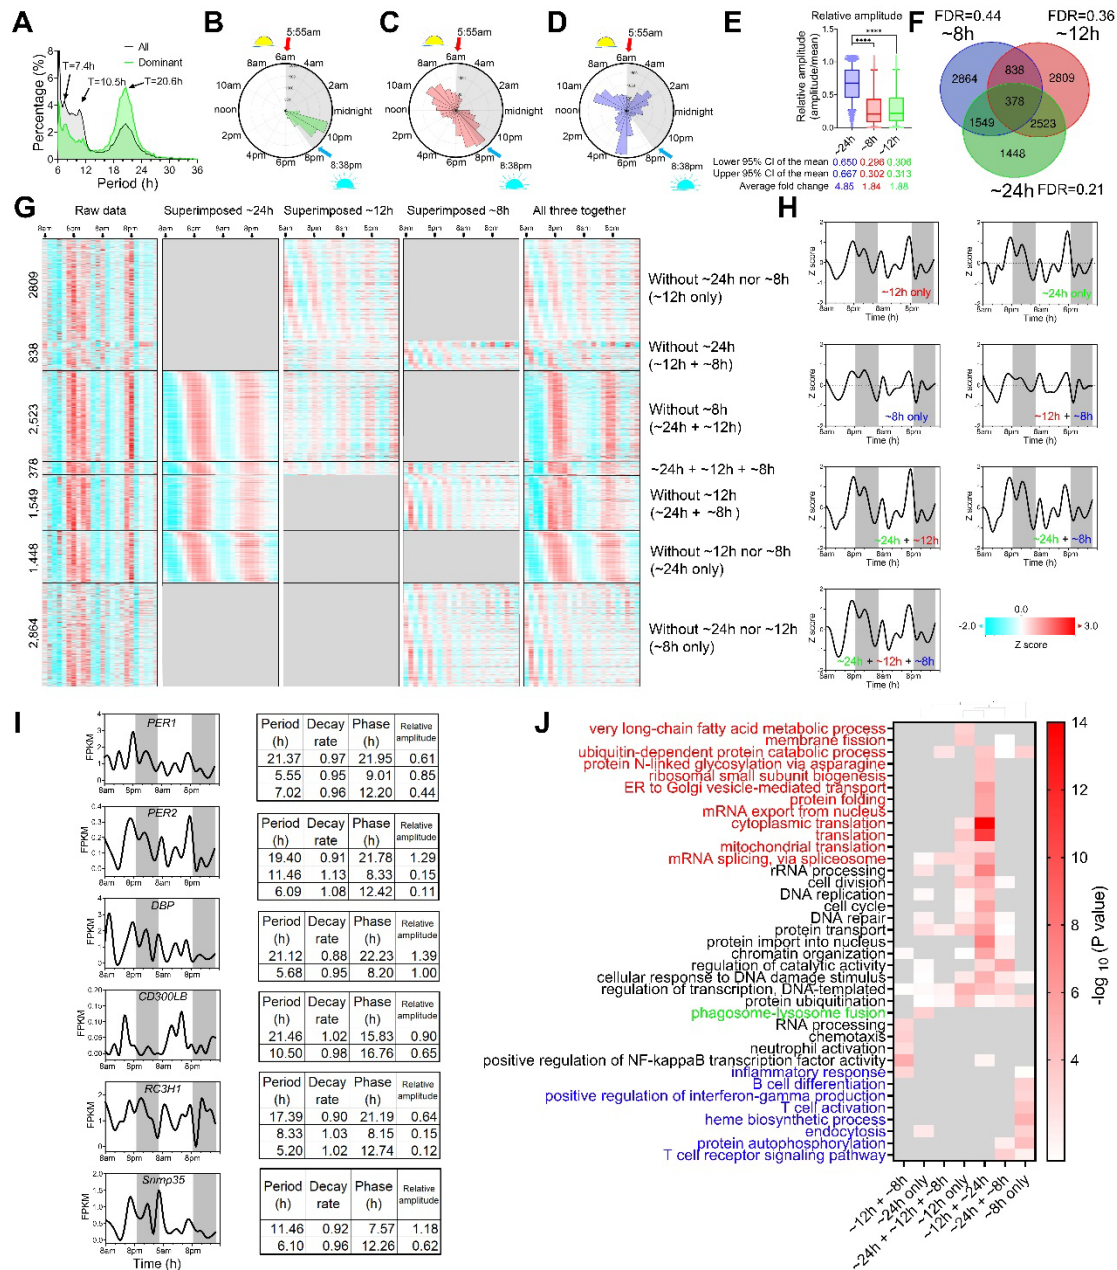

95

96 **Fig. S6. Transcriptome spectrum of the second human participant.** (A) Period distribution of  
 97 all and dominant oscillations. (B-D) Polar histogram illustrating the phase distribution of ~24-hour  
 98 (B), ~12-hour (C) and ~8-hour (D) oscillations. (E) Relative amplitude (mean-normalized) of ~8-  
 99 hour, ~12-hour and ~24-hour oscillations. (F) Venn diagram showing distinct and shared  
 100 oscillations for each period. (G, H) Heatmap (G) and quantification (H) of decomposition of raw  
 101 temporal transcriptome into harmonics cycling at ~8-hour, ~12-hour or ~24-hour periods. (I)  
 102 Representative temporal expression of selective genes and eigenvalue/pencil decomposition  
 103 uncovering all superimposed oscillations for each gene. (J) GO analysis of all genes in G.

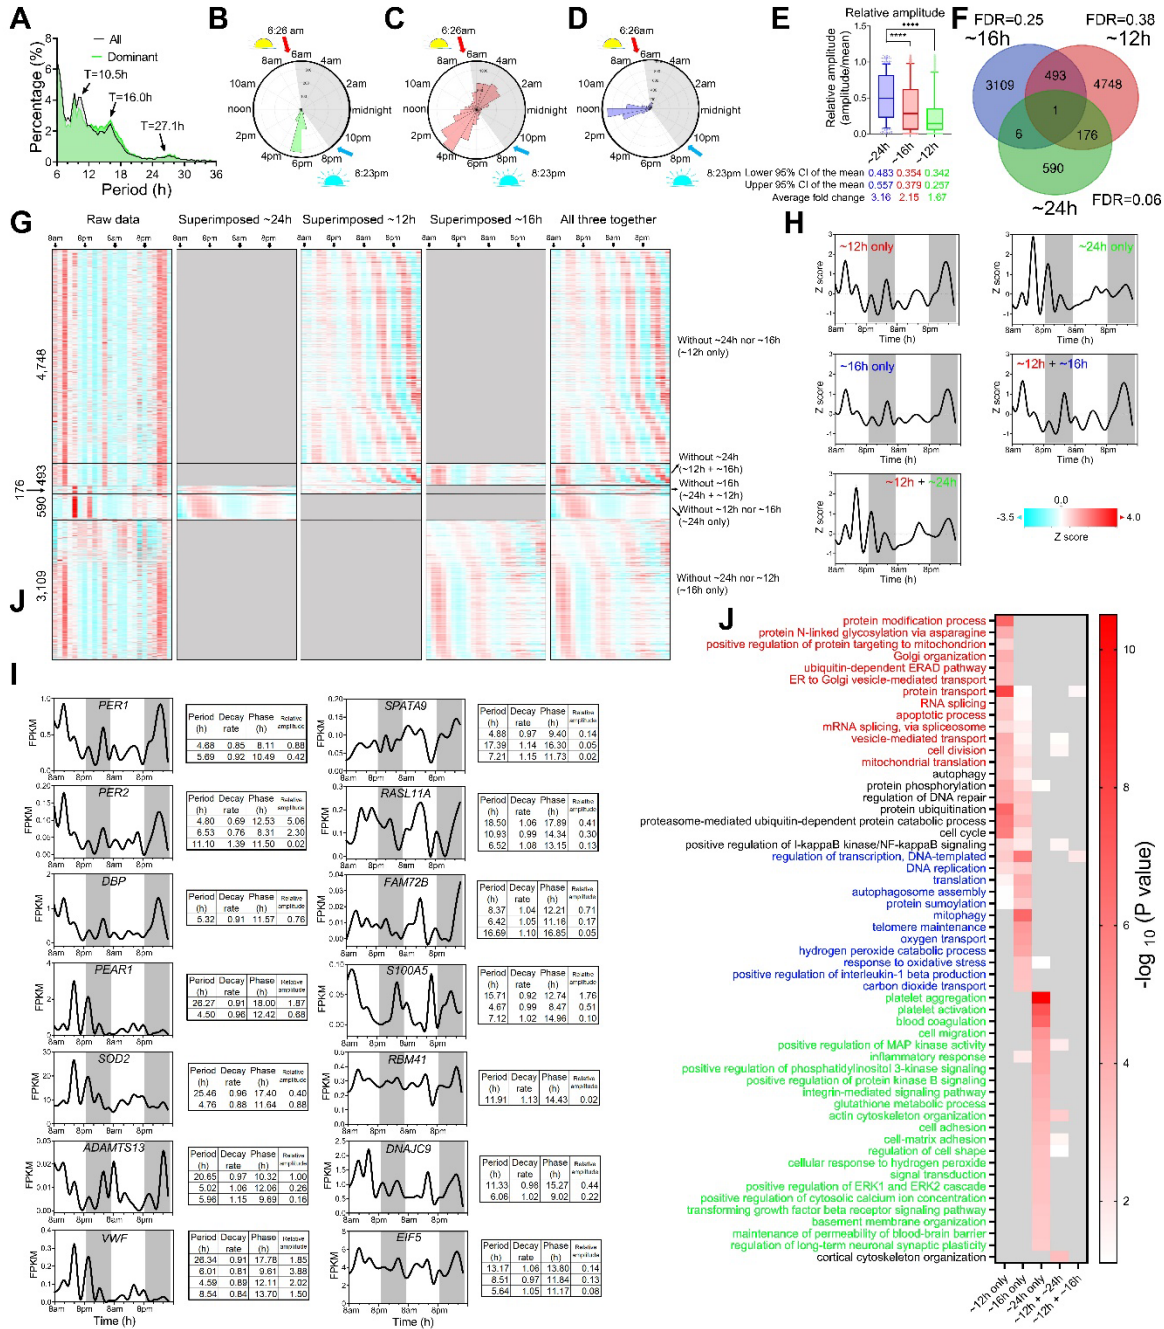

104

105 **Fig. S7. Transcriptome spectrum of the third human participant.** (A) Period distribution of all  
 106 and dominant oscillations. (B-D) Polar histogram illustrating the phase distribution of ~24-hour  
 107 (B), ~12-hour (C) and ~16-hour (D) oscillations. (E) Relative amplitude (mean-normalized) of ~16-  
 108 hour, ~12-hour and ~24-hour oscillations. (F) Venn diagram showing distinct and shared  
 109 oscillations for each period. (G, H) Heatmap (G) and quantification (H) of decomposition of raw  
 110 temporal transcriptome into oscillations cycling at ~16-hour, ~12-hour or ~24-hour periods. (I)  
 111 Representative temporal expression of selective genes and eigenvalue/pencil decomposition  
 112 uncovering all superimposed oscillations for each gene. (J) GO analysis of all genes in G.



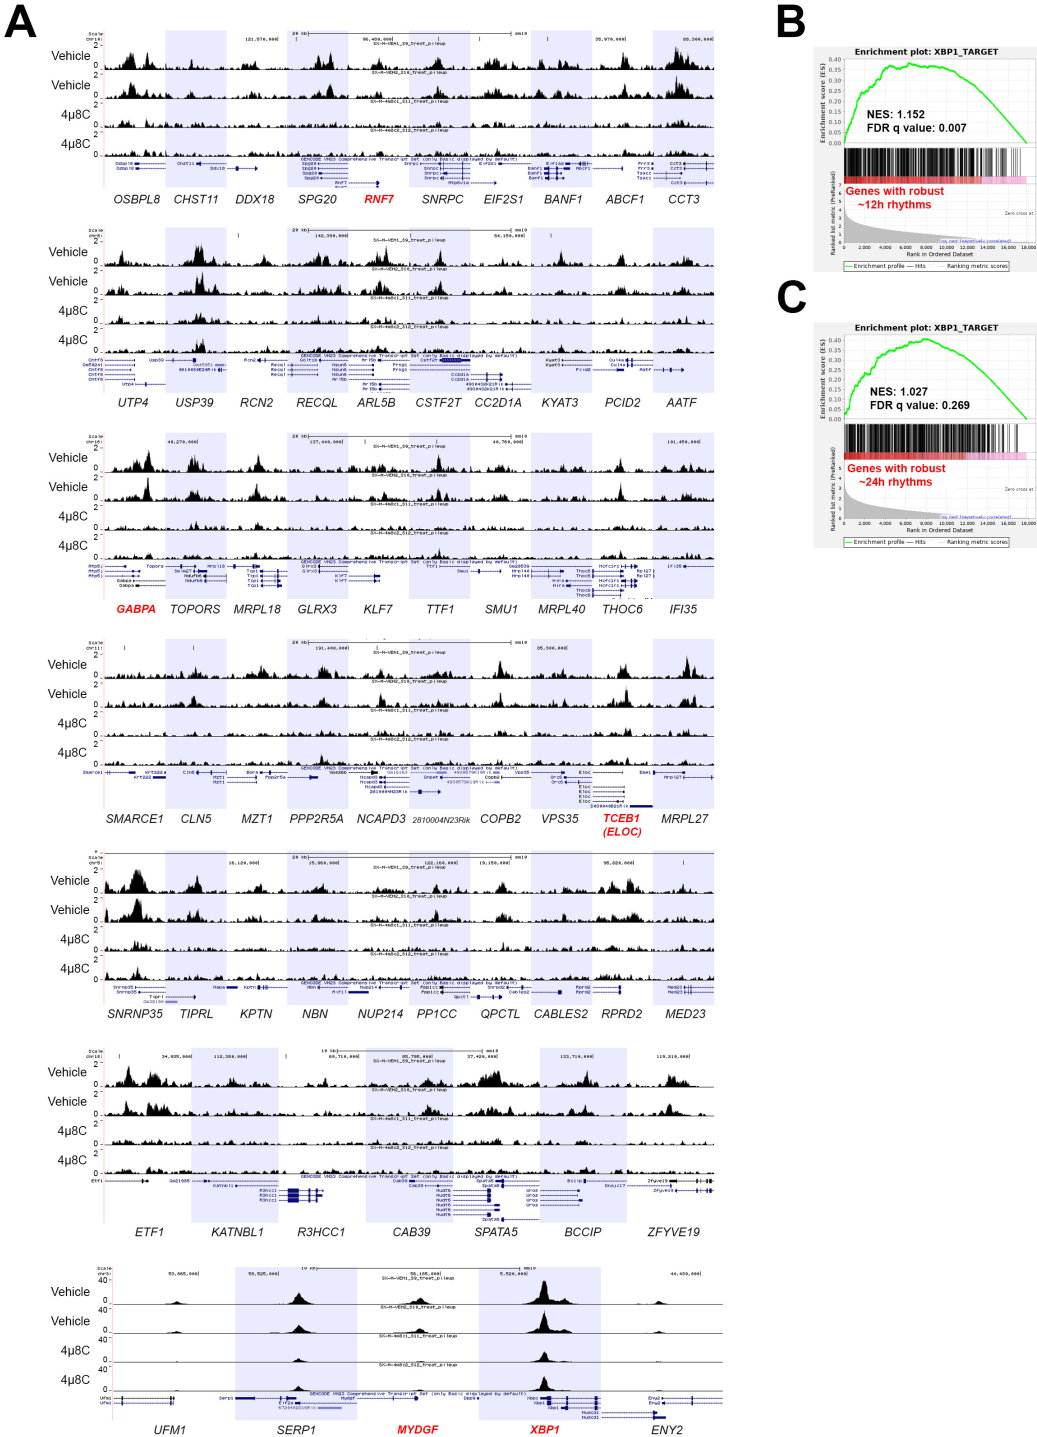

113

114 **Fig. S8. XBP1 chromatin binding landscape of 12-hour genes in mouse Th2 cells.** (A) UCSC  
 115 genome browser view of XBP1 chromatin recruitment to the promoters of a selected set of ~12-  
 116 hour genes in murine Th2 cells. (B, C) GSEA showing enrichment score of top 500 XBP1 target  
 117 genes in Th2 cells (ranked by fold reduction of target gene expression with XBP1 deletion) in  
 118 robust ~12-hour (B) or ~24-hour (C) genes identified in humans.

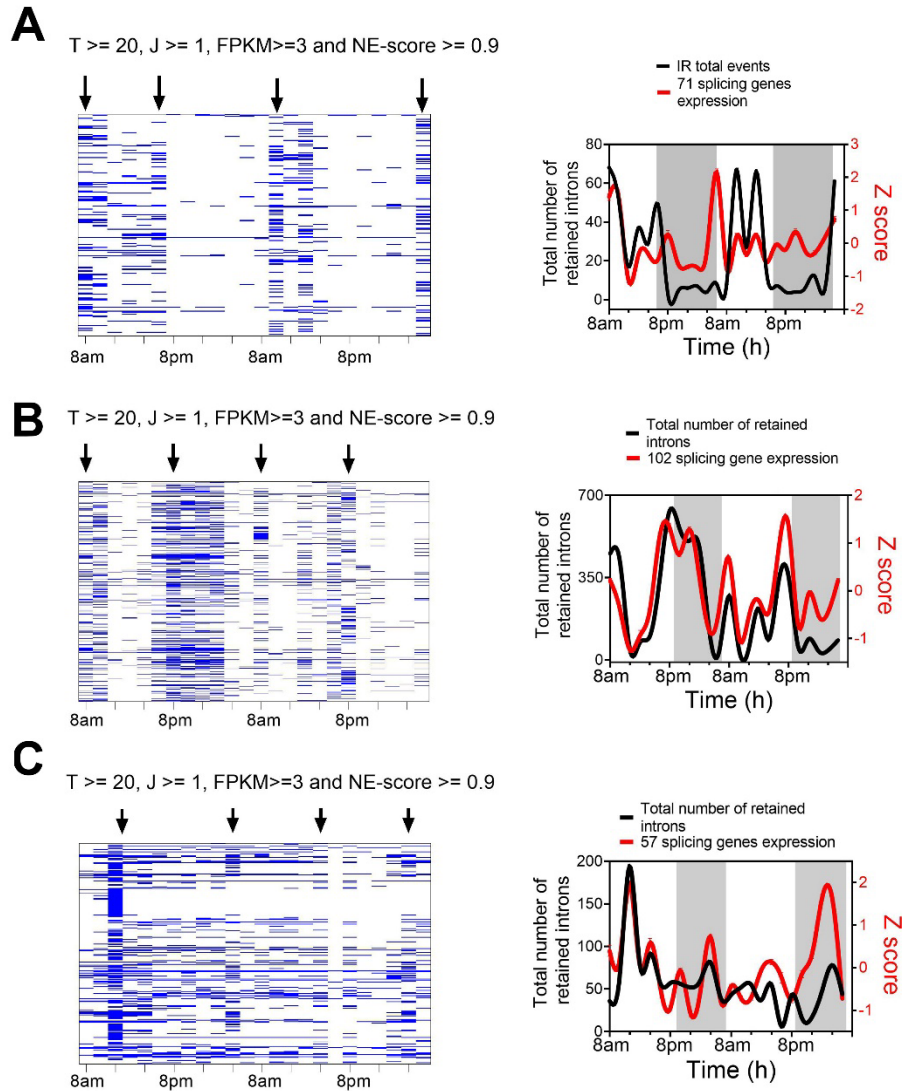

**D**

|        | Intron retention events rhythms |           |
|--------|---------------------------------|-----------|
|        | Period                          | p value   |
| First  | 10h                             | 0.2041    |
| Second | 12h                             | 0.0439    |
| Third  | 12h                             | 0.0056    |
| Meta   | 10-12h                          | 2.990E-03 |

119

120 **Fig. S9. ~12-hour rhythms are synchronized to global intron retention rhythms.** Criteria  
 121 for IR are set as  $T \geq 20, J \geq 1, \text{FPKM} \geq 3$  and  $\text{NE score} \geq 0.9$ . (A-C) Heatmap (left) and  
 122 quantification (right) of temporal IR events, superimposed with the Z score normalized temporal  
 123 expression of ~12-hour splicing gene expression in the first (A), second (B) and third (C)  
 124 participants. IR events are detected with the more stringent setting of the iRead algorithm as  
 125 described in the methods section. (D) Statistics for IR ~12-hour rhythms detection by RAIN.

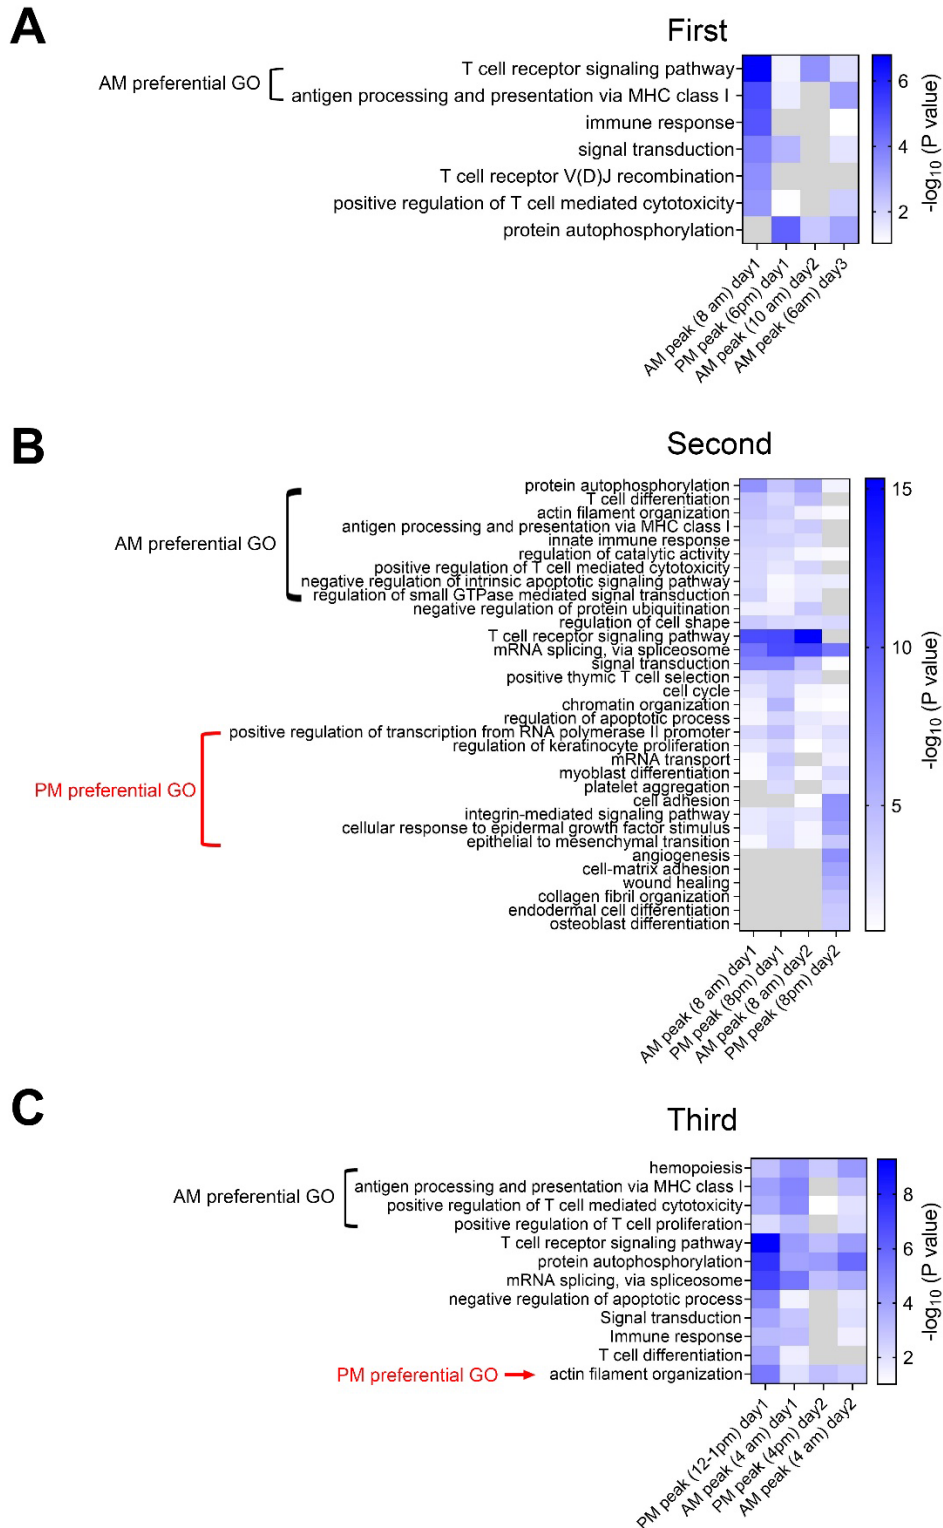

126

127 **Fig. S10. Genes with intron retentions are enriched in immune genes.** Intron retention events  
 128 are selected with default settings  $T \geq 20$ ,  $J \geq 1$ ,  $FPKM \geq 2$  and  $NE \text{ score} \geq 0.9$ . GO analysis of IR  
 129 genes at different peaks in the first (A), second (B) and third (C) participant.

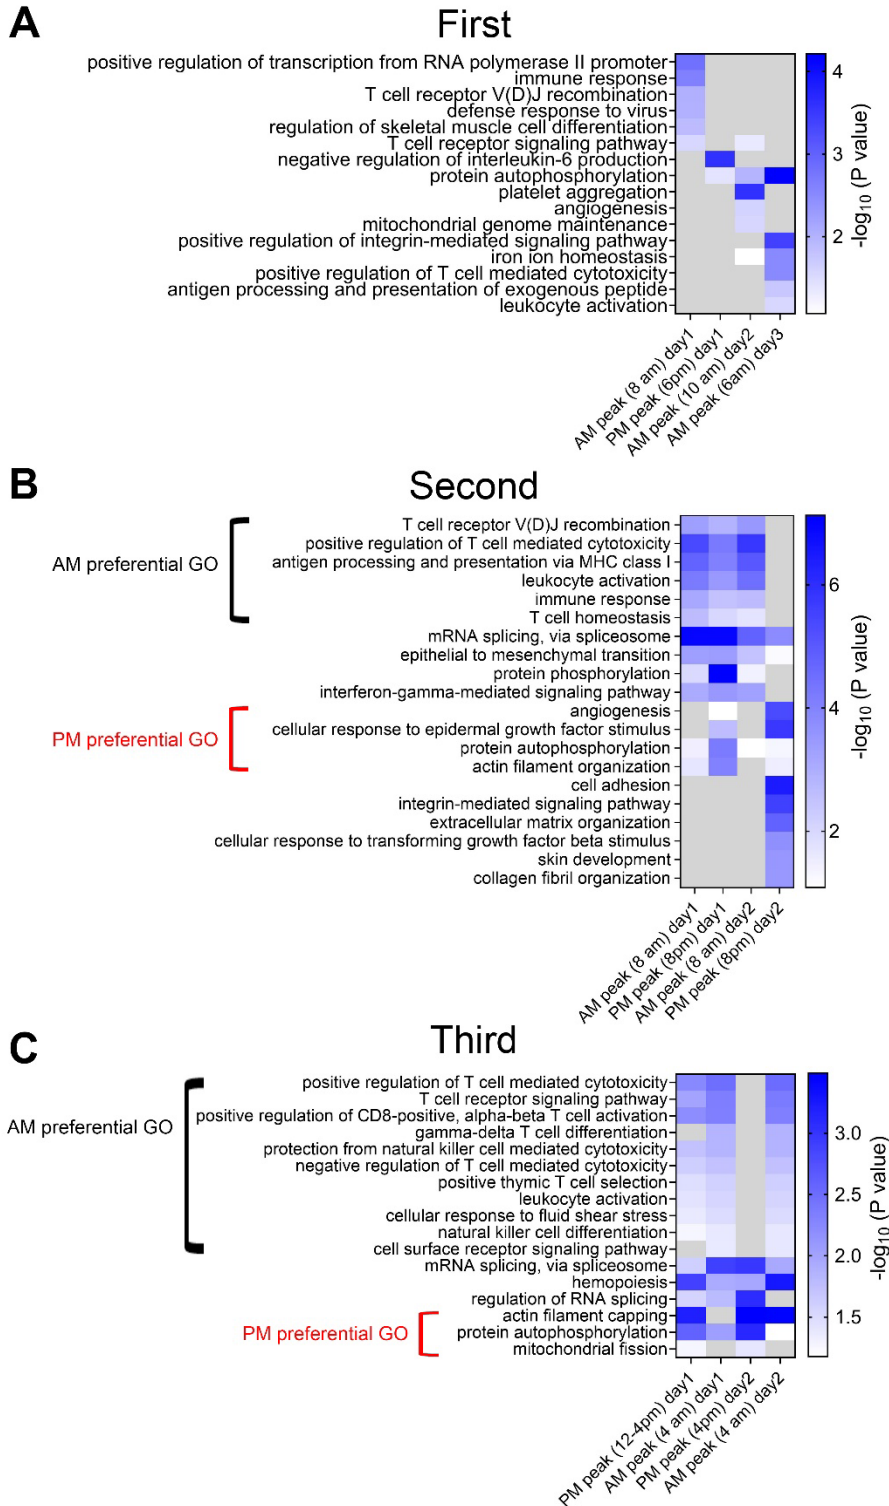

130

131 **Fig. S11. Genes with intron retentions (more stringent criterion) are enriched in immune**  
 132 **genes.** Intron retention events are selected with default settings  $T \geq 20$ ,  $J = 1$ ,  $FPKM \geq 3$  and NE  
 133 score  $\geq 0.9$ . GO analysis of IR genes at different peaks in the first (A), second (B) and third (C)  
 134 participant.

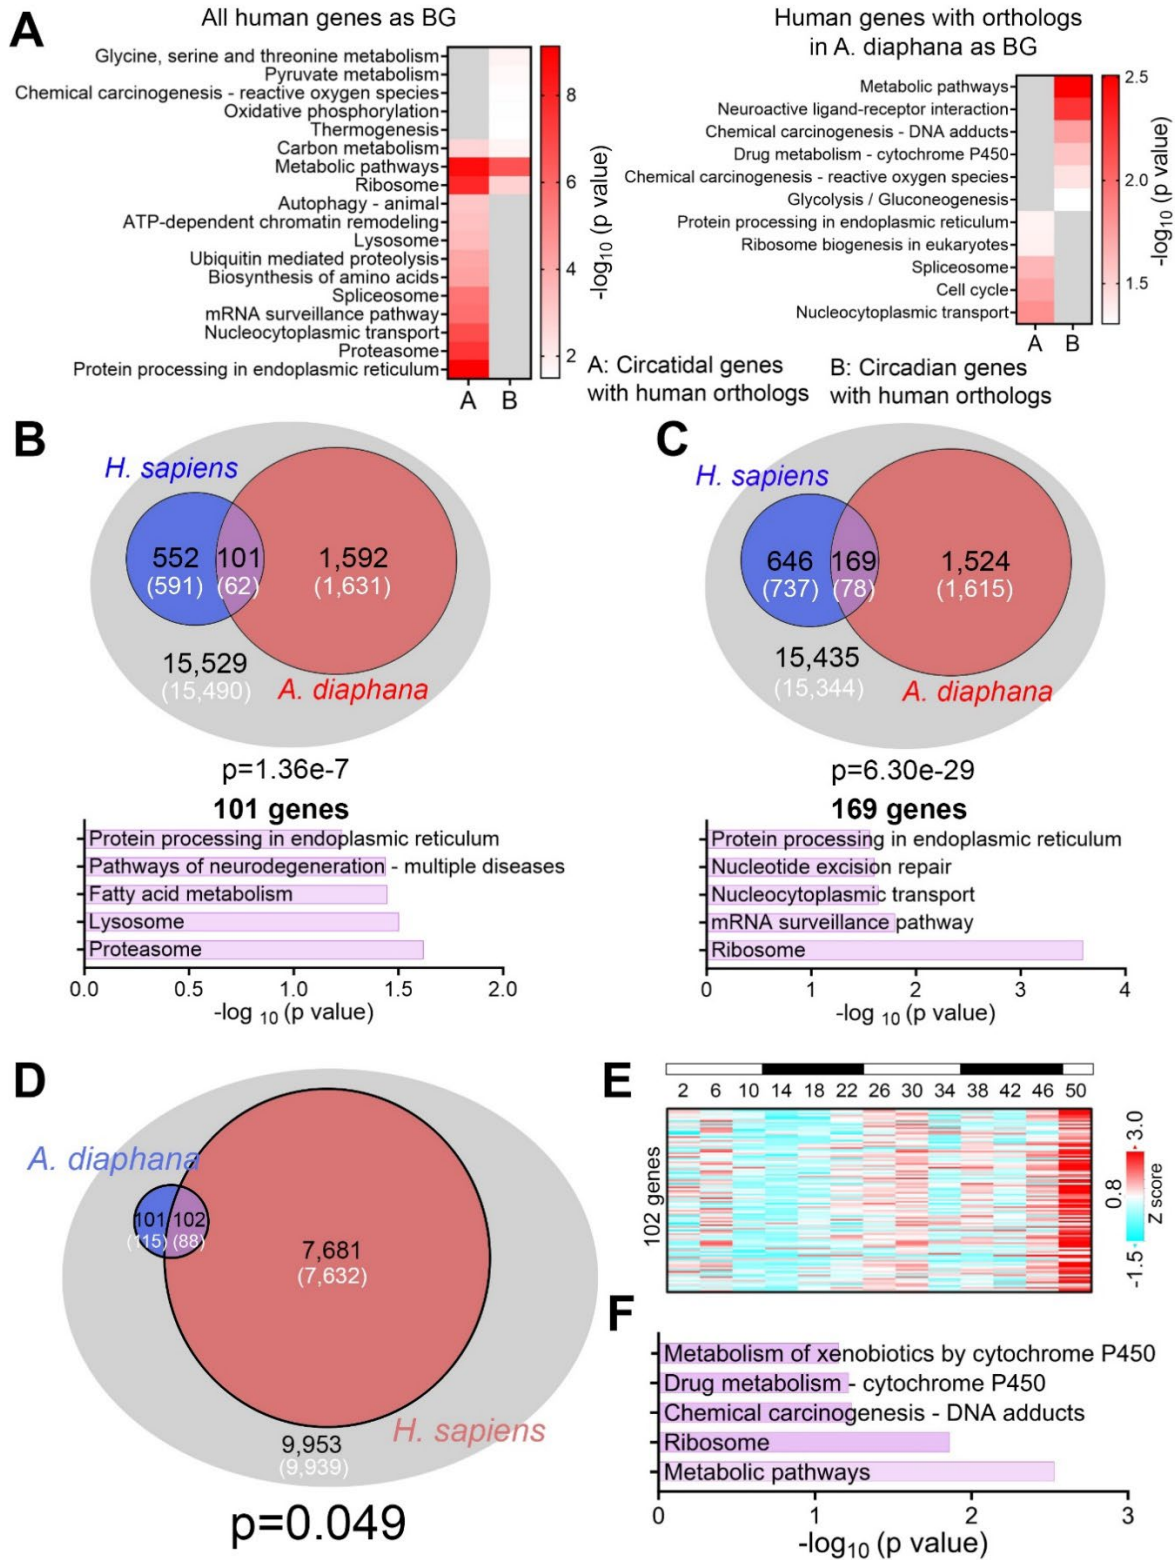

135  
136  
137  
138

**Fig. S12. Evolutionary conservation of ~12-hour, but not ~24-hour gene programs between *A. diaphana* and human.** (A) GO analysis of all circatidal genes in *A. diaphana* that have human orthologs using all human genes (left) or only those with *A. diaphana* orthologs (right) as

139 background. **(B, C)** Venn diagram comparing distinct and shared ~12-hour genes in human (653  
140 12-hour genes with meta adj-P<0.05 in **B** and 851 ~12-hour genes reported in Fig. S4B in **C** and  
141 *A. diaphana* (reported in <sup>49</sup>). Only genes that are expressed in human white blood cells (denoted  
142 by the grey circle) are included in the analysis. Both observed and predicted number of genes  
143 (under the null hypothesis that ~12-hour genes are not evolutionarily conserved and thus  
144 independently detected in these two species) are further shown. P values are calculated by the  
145 Chi-square test. GO analysis showing enriched KEGG terms for the 101 and 169 common genes,  
146 respectively. **(D)** Venn diagram comparing distinct and shared ~24-hour genes in human (meta  
147 adj-P<0.1) and *A. diaphana* (reported in <sup>49</sup>). Only genes that are expressed in human white blood  
148 cells (denoted by the grey circle) are included in the analysis. Both observed and predicted  
149 number of genes (under the null hypothesis that ~24-hour genes are not evolutionarily conserved  
150 and thus independently detected in these two species) are further shown. P value of 0.049 is  
151 calculated by Chi-square test. **(E, F)** Heatmap of temporal expression (Z score normalized) of 102  
152 ~24-hour genes in *A. diaphana* **(E)** and GO analysis of the top enriched pathways **(F)**.

153

154

155

156 Table S1. RPKM quantification of temporal expression for the human participants

157 Table S2. RAIN results for ~12-hour genes and meta-analysis of ~24-hour genes.

158 Table S3. Eigenvalue/pencil results

159

160

161
